# Supplementary material for: Biological Control of Three Major Cucumber and Pepper Pests: Whiteflies, Thrips, and Spider Mites, in High Plastic Tunnels Using Two Local Phytoseiid Mites
Source: MDPI journal article supplement (doi:10.3390/plants13060889), 2024-03-20
Supplement: s1 [file s1]

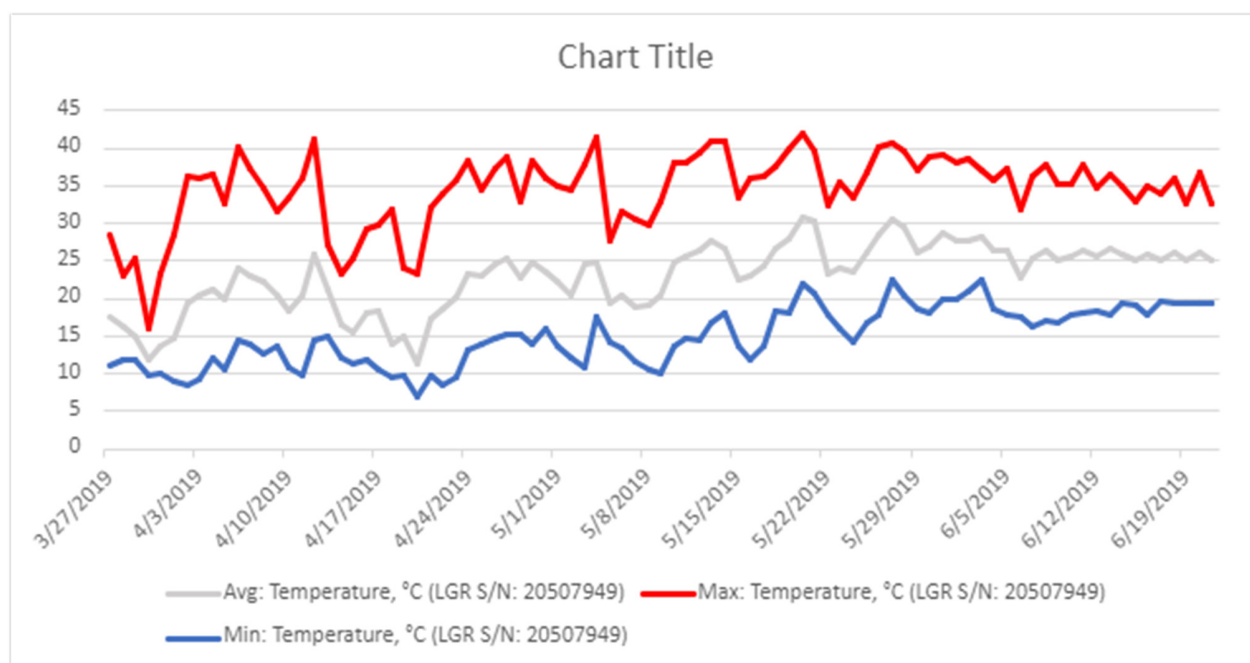

Figure S1. The average temperature at site I.

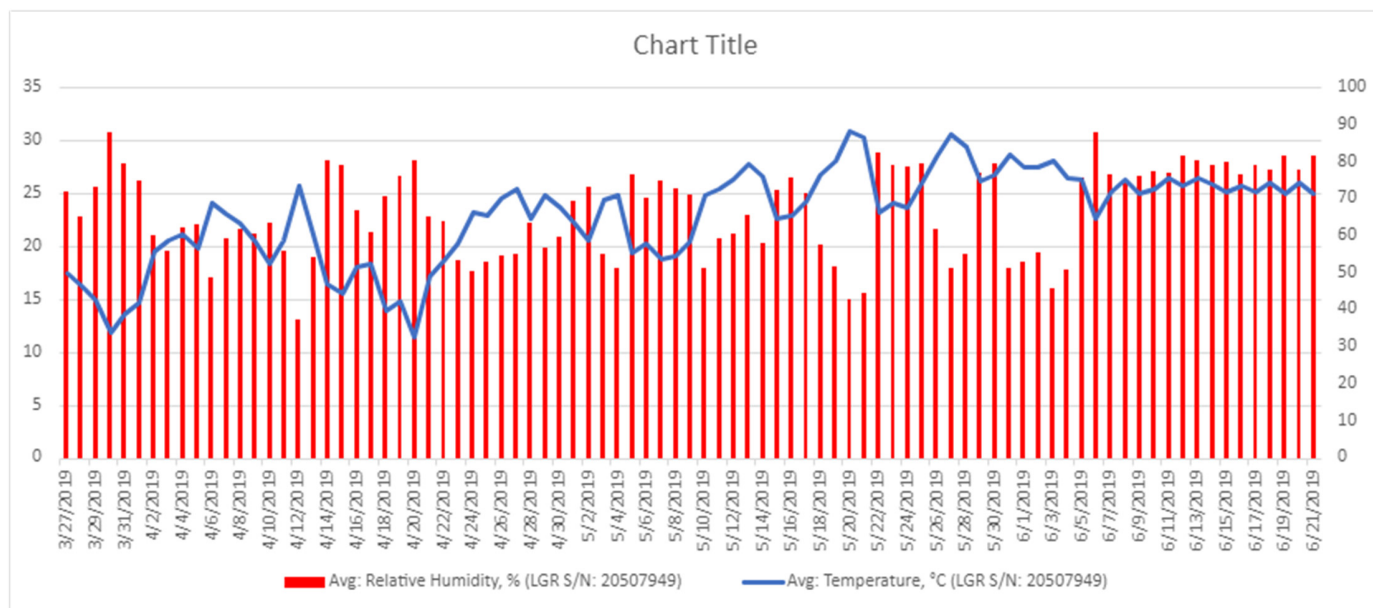

Figure S2. The average temperature and Relative Humidity at site I.

Table S1. Pesticide sprays in the Control greenhouse at site I.

| Week | Date      | Nb of sprays per week | Active Ingredient    |
|------|-----------|-----------------------|----------------------|
| 0    | 27/3/2019 | 2                     | Emamectin Benzoate   |
|      |           |                       | Acetamiprid          |
|      |           |                       | Fenbutatin oxide     |
| 1    | 3/4/2019  | 1                     | Mancozeb + Cymoxanil |
|      |           |                       | Acetamiprid          |
|      |           |                       | BT                   |
|      |           |                       | Flonicamid           |
| 2    | 10/4/2019 | 1                     | Acetamiprid          |
|      |           |                       | Tolfenpyrad          |
|      |           |                       | Mancozeb             |
| 3    | 17/4/2019 | 0                     | -                    |
| 4    | 24/4/2019 | 1                     | Chlorothalonil       |
| 5    | 1/5/2019  | 2                     | Abamectin            |
|      |           |                       | Thiamethoxam         |
|      |           |                       | Acetamiprid          |
|      |           |                       | Tolfenpyrad          |
|      |           |                       | Nemacis              |
| 6    | 8/5/2019  | 1                     | Thiamethoxam         |
|      |           |                       | Acetamiprid          |
| 7    | 15/5/2019 | 1                     | Mancozeb             |
| 8    | 22/5/2019 | 1                     | Acetamiprid          |
|      |           |                       | Abamectin            |
|      |           |                       | Tolfenpyrad          |
|      |           |                       | Carbosulfan          |
| 9    | 28/5/2019 | 0                     | -                    |
| 10   | 3/6/2019  | 2                     | Acetamiprid          |
|      |           |                       | Tolfenpyrad          |
|      |           |                       | Thiamethoxam         |
|      |           |                       | Mancozeb + Cymoxanil |

|    |           |   |              |
|----|-----------|---|--------------|
| 11 | 11/6/2019 | 1 | Abamectin    |
|    |           |   | Acetamiprid  |
|    |           |   | Thiamethoxam |
| 12 | 14/6/2019 | 0 | -            |
| 12 | 18/6/2019 | 1 | Abamectin    |
|    |           |   | Acetamiprid  |
|    |           |   | Thiamethoxam |
|    |           |   | Pyridaben    |
| 14 | 21/6/2019 | 0 | -            |

Table S2. Release dates and ratios of natural enemies in the BIPM greenhouse at site I.

| Date           | Week | <i>Amblyseius swirskii</i> | <i>Phytoseiulus persimilis</i> | <i>Beauveria bassiana</i>   |
|----------------|------|----------------------------|--------------------------------|-----------------------------|
| March 27,2019  | 0    | 16,000                     | 2,500                          |                             |
| April 3, 2019  | 1    | 8,000                      |                                |                             |
| April 10 ,2019 | 2    | 27,000                     | 1,200                          | 10 <sup>8</sup> on hotspots |
| April 17 ,2019 | 3    | -                          | -                              | -                           |
| April 24,2019  | 4    | -                          | -                              | -                           |
| May 1,2019     | 5    | 15,000                     | -                              | 10 <sup>8</sup> on hotspots |
| May 8,2019     | 6    | 26,000                     | 700                            | 10 <sup>8</sup> on hotspots |
| May 15,2019    | 7    | 10,000                     | 1,000                          |                             |
| May 22,2019    | 8    | 5,000                      | 1,000                          |                             |
| May 28,2019    | 9    | -                          | 5,000                          |                             |
| June 3,2019    | 10   | -                          | 500                            |                             |
| June 11,2019   | 11   | -                          | 2,000                          |                             |

|              |    |   |       |  |
|--------------|----|---|-------|--|
| June 14,2019 | 12 | - | 2,000 |  |
| June 18,2019 | 13 | - | -     |  |

$$107,000/400= 267$$

$$15,900/400= 40/m^2$$

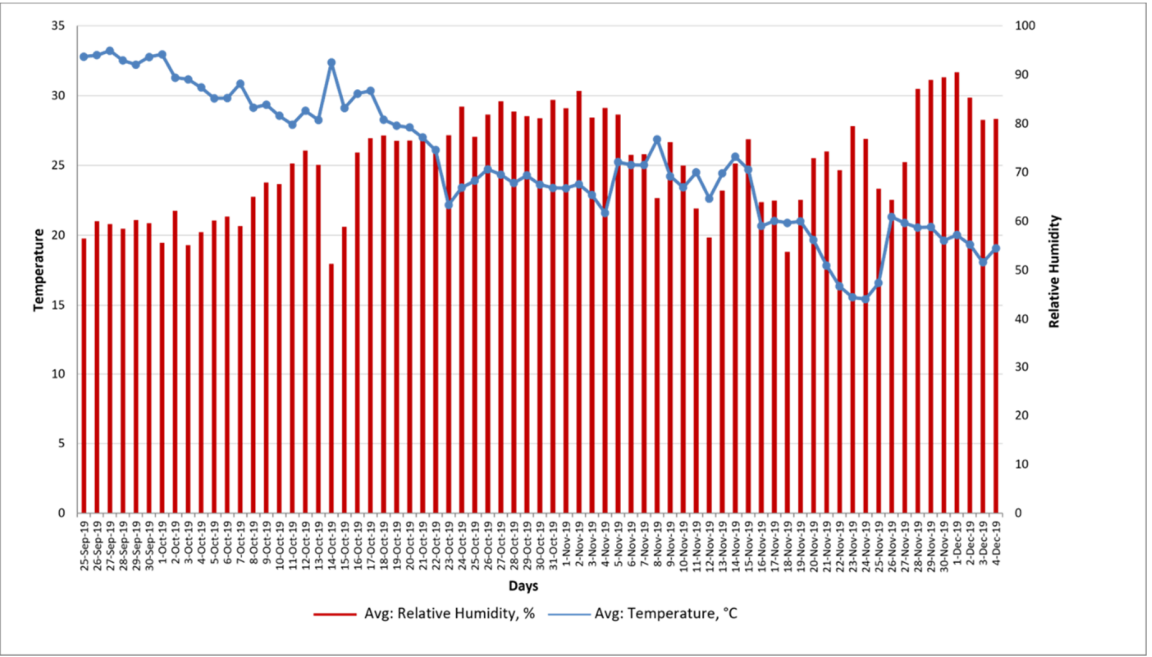

Figure S3. The average temperature and Relative Humidity at site II.

Table S3. Pesticide sprays in the Control greenhouse at site II

| Week     | Date       | Nb of sprays per week | Active Ingredient   |
|----------|------------|-----------------------|---------------------|
| <u>0</u> | 25/9/2019  | 1                     | Abamectin           |
|          |            |                       | Lambda- Cyhalothrin |
| <u>1</u> | 2/10/2019  | 1                     | Acetamiprid (20%)   |
| <u>2</u> | 9/10/2019  | 1                     | Acetamiprid (20%)   |
| <u>3</u> | 16/10/2019 | 0                     | -                   |
| <u>4</u> | 1/11/ 2019 | 1                     | Acetamiprid (20%)   |
|          |            |                       | Abamectin           |
| <u>5</u> | 6/11/2019  | 1                     | Acetamiprid (20%)   |
|          |            |                       | Abamectin           |
| <u>6</u> | 14/11/2019 | 0                     | -                   |
| <u>7</u> | 20/11/2019 | 1                     | Abamectin           |
|          |            |                       | Lambda- Cyhalothrin |
| <u>8</u> | 28/11/2019 | 0                     | -                   |
| <u>9</u> | 4/12/2019  | 0                     | -                   |

Table S4. Release dates and ratios of natural enemies in the BIPM greenhouse at site II

| Date             | Week | <i>Amblyseius swirskii</i> | <i>Phytoseiulus persimilis</i> | <i>Beauveria bassiana</i> |
|------------------|------|----------------------------|--------------------------------|---------------------------|
| <u>25/9/2019</u> | 0    | 8,125                      | -                              | -                         |
| <u>2/10/2019</u> | 1    | -                          | -                              | -                         |

|                   |   |        |       |                                      |
|-------------------|---|--------|-------|--------------------------------------|
| <u>9/10/2019</u>  | 2 | 8,125  | 1,000 | -                                    |
| <u>16/10/2019</u> | 3 | -      | 620   | -                                    |
| <u>1/11/ 2019</u> | 4 | 16,250 | 1,500 | 10 <sup>8</sup> spore/ml on hotspots |
| <u>6/11/2019</u>  | - | -      | -     | 10 <sup>8</sup> spore/ml on hotspots |
| <u>14/11/2019</u> | 6 | 16,250 | -     | 10 <sup>8</sup> spore/ml on hotspots |
| <u>20/11/2019</u> | 7 | -      | -     | -                                    |
| <u>28/11/2019</u> | 8 | -      | -     | 75L of 10 <sup>8</sup> spore/ml)     |
| <u>4/12/2019</u>  | 9 | -      | -     | 75L of 10 <sup>8</sup> spore/ml)     |

48,750/325=150    3120/325=9.6

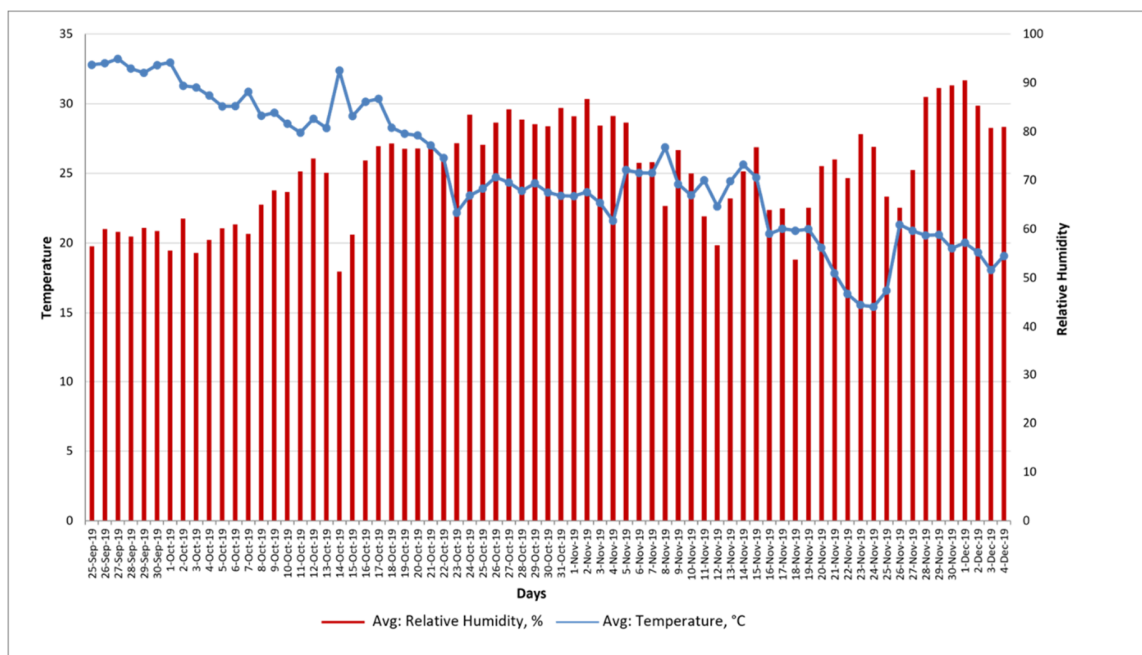

Figure S4. Average temperature and Relative Humidity at site II
